# Supplementary material for: Potatoes and risk of chronic disease: a systematic review and dose–response meta-analysis
Source: Springer Nature journal article supplement (doi:10.1007/s00394-018-1774-2), 2018-07-09
Supplement: MOESM1 [file 15927312]

# Potatoes and risk of chronic disease: a systematic review and dose-response meta-analysis

Lukas Schwingshackl<sup>1,2</sup>, Carolina Schwedhelm<sup>1,2</sup>, Georg Hoffmann<sup>3</sup>, Heiner Boeing<sup>1,2</sup>

<sup>1</sup> Department of Epidemiology, German Institute of Human Nutrition Potsdam-Rehbruecke (DIfE), Arthur-Scheunert-Allee 114-116, 14558 Nuthetal, Germany

<sup>2</sup> NutriAct – Competence Cluster Nutrition Research Berlin-Potsdam

<sup>3</sup> Department of Nutritional Sciences, University of Vienna, Althanstraße 14, UZA II, 1090 Vienna, Austria

Corresponding author: Lukas Schwingshackl, PhD

Arthur-Scheunert-Allee 114-116; 14558 Nuthetal, Germany

M: lukas.schwingshackl@dife.de

T: +49 (0)33200 88-2723

**Abbreviations:**

7TT: Seven Townships Taiwan

95% CI: 95% confidence interval

aHEI: alternate Healthy Eating Index

AHS: Adventist Health Study

BCDDP: Breast Cancer Demonstration Project) follow-up study cohort

BMI: Body Mass Index

C: Colon

CHD: Coronary heart disease

COSM: Cohort of Swedish Men

CRC: Colorectal cancer

DASH: Dietary approaches to Stop Hypertension

DDCHS: Danish Diet, Cancer and Health Study

EPIC: European Prospective Investigation Into Cancer and Nutrition

FMCHES: Finnish Mobile Clinic Health Examination Survey

FFQ: Food frequency questionnaire

HF: Heart failure

HR: Hazard ratio

HPFS: Health Professional Follow-up study

IWHS: Iowa Women's Health Study

M: Men

MCCS: Melbourne Collaborative Cohort Study

MDCS: Malmö Diet and Cancer Study

MI: Myocardial infarction

MICOL: Multicentrica Italiana Colelitiasi, Italian, Multicentric study for cholelithiasis

NHS: Nurses' Health Study

NOWAC: Norwegian Women and Cancer study

NUTRIHEP: Nutrition Hepatology Study

NYUWHS: New York University Women's Health Study

OICS: Osteoarthritis Initiative Cohort Study

OR: Odds ratio

R: Rectum

RR: Risk ratio

Electronic Supplemental Material

SDASE: Study on Diet, antioxidant status and survival in the elderly

SMC: Sweden Mammography cohort

SUN: Seguimiento University of Navarra

SWHS: Shanghai Women's Health Study

T2D: Type 2 diabetes mellitus

US: United States

W: Women

WHS: Women's Health Study

## Electronic Supplemental Material

ESM Material 1:

Search strategy (PubMed):

#1 potato\*[tiab] OR solanum tuberosum[tiab] OR french fry[tiab] OR french fries[tiab] OR potato chip\*[tiab]

#2 mortality[tiab] OR death[tiab]

#3 cardiovascular[tiab] OR coronary[tiab] OR stroke[tiab] OR vascular[tiab] OR myocardial infarction[tiab] OR heart failure[tiab]

#4 colon[tiab] OR rectum[tiab] OR rectal[tiab] OR colorectal[tiab] OR colorectum[tiab] OR bowel[tiab]

#5 diabetes[tiab]

#6 hypertension[tiab] OR hypertensive[tiab] OR systolic[tiab] OR diastolic[tiab] OR blood pressure[tiab]

#7 prospective OR cohort OR longitudinal OR follow-up OR case-cohort OR nested case-control

#8 (#1 AND #2 OR #3 OR #4 OR #5 OR #6 AND #7)

Electronic Supplemental Material

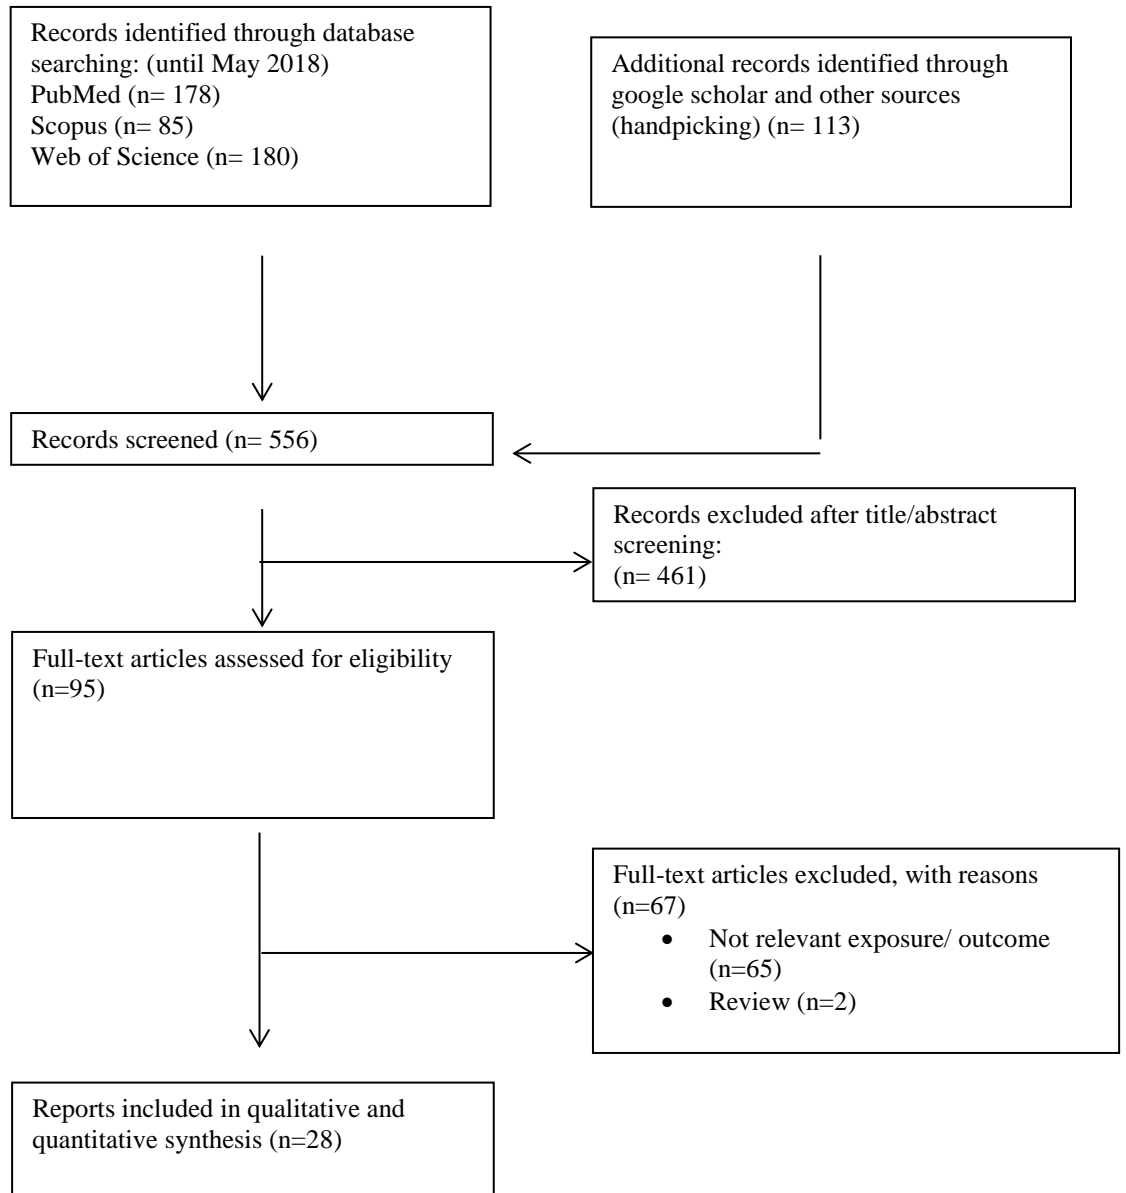

ESM Figure 1: Flow diagram for study selection

Electronic Supplemental Material

ESM Material 2: Full-text publications excluded with reason

|          |                                |
|----------|--------------------------------|
| (1-65)   | Not relevant exposure/ outcome |
| (66, 67) | Reviews                        |

Electronic Supplemental Material

ESM Table 1: General study characteristics of the included studies investigating the association between potatoes intake and risk all-cause mortality, coronary heart disease, stroke, heart failure, colorectal cancer, type 2 diabetes, and hypertension.

| First Author | Year | Country | Cohort Name | Age at entry, y | Sex | Sample size, n | Total cases, n | Dietary assessment | Outcome      | Outcome assessment                       | Type potatoes                                                             | Adjustment factors                                                                                                                                                                                                                                                                                                          | Follow up years        | Results (high vs. low intake category) RR/HR/OR (95% CI)                                                                                                                                                      |
|--------------|------|---------|-------------|-----------------|-----|----------------|----------------|--------------------|--------------|------------------------------------------|---------------------------------------------------------------------------|-----------------------------------------------------------------------------------------------------------------------------------------------------------------------------------------------------------------------------------------------------------------------------------------------------------------------------|------------------------|---------------------------------------------------------------------------------------------------------------------------------------------------------------------------------------------------------------|
| Asli         | 2016 | Norway  | NOWAC       | 30-70           | W   | 95,942         | 912            | FFQ, validated     | CRC          | Linkage to the Cancer Registry of Norway | Total potato consumption (usually boiled potatoes)                        | Education, smoking, red meat, milk, non-potato fibre, processed meat, hormone replacement therapy, carbohydrate energy, and non-carbohydrate energy, pasta, rice, fruit, and vegetables.                                                                                                                                    | 12                     | 1.30 (1.07, 1.57)<br><br>3 vs. 1 tertile                                                                                                                                                                      |
| Borgi        | 2016 | US      | NHS         | 30-55           | W   | 62,175         | 35,375         | FFQ, validated     | Hypertension | Self-reported (validated)                | Total potato consumption; Baked, boiled, or mashed potatoes; French fries | Age, race/ethnicity, BMI, smoking status, physical activity, weight change, menopausal status, alcohol intake, analgesic use, family history of hypertension, total energy intake, animal flesh intake, whole grains, sugar sweetened drink intake, artificially sweetened diet drink intake, total fruit, total vegetables | 1,034,421 person years | Total potato consumption: 1.07 (0.92, 1.24)<br><br>5 vs. 1 quintile<br><br>Baked, boiled, or mashed: 1.13 (1.02, 1.26)<br><br>4 vs. 1 quartile<br><br>French fries: 1.17 (0.92, 1.50)<br><br>4 vs. 1 quartile |
| Borgi        | 2016 | US      | NHS II      | 25-42           | W   | 88,475         | 25,246         | FFQ, validated     | Hypertension | Self-reported (validated)                | Total potato consumption;                                                 | Age, race/ethnicity, BMI, smoking                                                                                                                                                                                                                                                                                           | 1,344,475 person       | Total potato consumption: 1.42                                                                                                                                                                                |

Electronic Supplemental Material

|       |      |        |             |       |      |        |        |                |              |                                                 |                                                                           |                                                                                                                                                                                                                                                                                                                           |                      |                                                                                                                                                                                                               |
|-------|------|--------|-------------|-------|------|--------|--------|----------------|--------------|-------------------------------------------------|---------------------------------------------------------------------------|---------------------------------------------------------------------------------------------------------------------------------------------------------------------------------------------------------------------------------------------------------------------------------------------------------------------------|----------------------|---------------------------------------------------------------------------------------------------------------------------------------------------------------------------------------------------------------|
|       |      |        |             |       |      |        |        |                |              |                                                 | Baked, boiled, or mashed potatoes; French fries                           | status, physical activity, weight change, menopausal status, alcohol intake, current oral contraceptive use, analgesic use, family history of hypertension, total energy intake, animal flesh intake, whole grains, sugar sweetened drink intake, artificially sweetened diet drink intake, total fruit, total vegetables | years                | (1.18, 1.72)<br><br>5 vs. 1 quintile<br><br>Baked, boiled, or mashed:<br>1.25 (1.11, 1.41)<br><br>4 vs. 1 quartile<br><br>French fries:<br>1.17 (1.04, 1.33)<br><br>4 vs. 1 quartile                          |
| Borgi | 2016 | US     | HPFS        | 40-75 | M    | 36,803 | 16,752 | FFQ, validated | Hypertension | Self-reported (validated)                       | Total potato consumption; Baked, boiled, or mashed potatoes; French fries | Age, race/ethnicity, BMI, smoking status, physical activity, weight change, alcohol intake, analgesic use, family history of hypertension, total energy intake, animal flesh intake, whole grains, sugar sweetened drink intake, artificially sweetened diet drink intake, total fruit, total vegetables                  | 560,228 person years | Total potato consumption: 0.96 (0.79, 1.16)<br><br>5 vs. 1 quintile<br><br>Baked, boiled, or mashed: 0.95 (0.84, 1.08)<br><br>4 vs. 1 quartile<br><br>French fries: 1.16 (1.00, 1.33)<br><br>4 vs. 1 quartile |
| Dilis | 2012 | Greece | EPIC-Greece | 20-86 | Both | 23,929 | 636    | FFQ, validated | CHD          | Self-reported/confirmed through medical records | Potatoes                                                                  | Age, BMI, height, physical activity, years of schooling, energy intake, alcohol consumption, smoking, arterial                                                                                                                                                                                                            | 10                   | 1.01 (0.91, 1.12)<br><br>Per 1 SD increment                                                                                                                                                                   |



Electronic Supplemental Material

|          |      |           |       |       |      |        |       |                |                     |                                                                    |                                                                       |                                                                                                                                                                                                             |     |                                                                 |
|----------|------|-----------|-------|-------|------|--------|-------|----------------|---------------------|--------------------------------------------------------------------|-----------------------------------------------------------------------|-------------------------------------------------------------------------------------------------------------------------------------------------------------------------------------------------------------|-----|-----------------------------------------------------------------|
|          |      |           |       |       |      |        |       |                |                     |                                                                    |                                                                       | blood pressure, other nutritional variables                                                                                                                                                                 |     |                                                                 |
| Flood    | 2002 | US        | BCDDP | 60    | W    | 45,490 | 314   | FFQ, validated | CRC                 | Self-reported, phone calls, mailing, medical and pathology records | Potatoes (except French fries)                                        | Multivitamin supplement use, BMI, height, use of nonsteroidal anti-inflammatory drugs, smoking status, education level, physical activity, and intakes of grains, red meat, calcium, vitamin D, and alcohol | 8.6 | 0.82 (0.65, 1.15)<br>5 vs. 1 quintile                           |
| Gonzalez | 2008 | Spain     | SDASE | 60-85 | Both | 288    | 83    | FFQ            | All-cause mortality | Death registers                                                    | Potatoes                                                              | Age, sex, BMI, energy intake, hyperglycaemia, hypercholesterolemia, chewing ability, physical activity, smoking, self-perceived health, education level, institution                                        | 6   | 1.32 (1.03, 1.69)<br>Per 1 SD increment                         |
| Hodge    | 2004 | Australia | MCCS  | 40-69 | Both | 31,641 | 365   | FFQ            | T2D                 | Self-reported/ doctor confirmation                                 | Potatoes                                                              | Age, sex, BMI, waist: hip ratio, energy intake, education, alcohol, physical activity, weight change in the last 5 years, country of birth, family history of diabetes                                      | 4   | 0.98 (0.70, 1.37)<br>4 vs. 1 quartile                           |
| Hu       | 2017 | Spain     | SUN   | 36    | Both | 13,837 | 1,111 | FFQ            | Hypertension        | Self-reported and validated                                        | Total potato consumption; Cooked and roasted potatoes; Fried potatoes | Age, sex, and recruitment period as well as for BMI, family history of hypertension, physical activity, smoking, education,                                                                                 | 6.7 | Total potato consumption: 0.98 (0.80, 1.19)<br>5 vs. 1 quintile |

Electronic Supplemental Material

|           |      |     |      |       |   |        |     |                |                  |                                              |                                                                                                                                                                                                          |                                                                                                                                                                                                                                                              |                                                                                                                                      |                                           |
|-----------|------|-----|------|-------|---|--------|-----|----------------|------------------|----------------------------------------------|----------------------------------------------------------------------------------------------------------------------------------------------------------------------------------------------------------|--------------------------------------------------------------------------------------------------------------------------------------------------------------------------------------------------------------------------------------------------------------|--------------------------------------------------------------------------------------------------------------------------------------|-------------------------------------------|
|           |      |     |      |       |   |        |     |                |                  |                                              | television watching, total energy intake, sodium intake, consumption of fast food, low-fat dairy products, fruits, vegetables, tree nuts, fried foods, alcohol, olive oil, and sugar-sweetened beverages |                                                                                                                                                                                                                                                              | Cooked/ roasted potatoes: 0.88 (0.73, 1.07)<br><br>5 vs. 1 quintile<br><br>Fried potatoes: 0.92 (0.75, 1.13)<br><br>5 vs. 1 quintile |                                           |
| Joshiपुरa | 1999 | USA | NHS  | 34-59 | W | 75,596 | 366 | FFQ, validated | Ischaemic stroke | Self-reported/questionnaire; medical records | Potatoes                                                                                                                                                                                                 | Age, smoking, alcohol, family history of myocardial infarction, BMI, vitamin supplement use, vitamin E use, physical activity, aspirin use, 7 time periods for women, hypertension and hypercholesterolemia, total energy intake, postmenopausal hormone use | 14                                                                                                                                   | 1.09 (0.69, 1.72)<br><br>5 vs. 1 quintile |
| Joshiपुरa | 1999 | USA | HPFS | 40-75 | M | 38,683 | 204 | FFQ, validated | Ischaemic stroke | Self-reported/questionnaire; medical records | Potatoes                                                                                                                                                                                                 | Age, smoking, alcohol, family history of myocardial infarction, BMI, vitamin supplement use, vitamin E use, physical activity, aspirin use, 7 time periods for women, hypertension and hypercholesterolemia, total energy intake, postmenopausal             | 8                                                                                                                                    | 1.23 (0.88, 1.72)<br><br>5 vs. 1 quintile |

Electronic Supplemental Material

|           |      |        |         |       |      |        |           |                       |                     |                                                                                               |                          |                                                                                                                                                                                                                                                                                               |     |                                       |
|-----------|------|--------|---------|-------|------|--------|-----------|-----------------------|---------------------|-----------------------------------------------------------------------------------------------|--------------------------|-----------------------------------------------------------------------------------------------------------------------------------------------------------------------------------------------------------------------------------------------------------------------------------------------|-----|---------------------------------------|
| Joshiपुरa | 2001 | USA    | NHS     | 34-59 | W    | 84,251 | 1,127     | FFQ, validated        | CHD                 | Records were reviewed by physicians who were blinded to the participants' risk factor status. | Potatoes                 | hormone use<br>Age, smoking, alcohol, family history of myocardial infarction, BMI, vitamin supplement use, vitamin E use, physical activity, aspirin use, 2-year follow-up period, presence of hypertension, presence of hypercholesterolemia, energy intake, and postmenopausal hormone use | 14  | 0.78 (NA)<br>5 vs. 1 quintile         |
| Joshiपुरa | 2001 | USA    | HPFS    | 40-75 | M    | 42,148 | 1,063     | FFQ, validated        | CHD                 | Records were reviewed by physicians who were blinded to the participants' risk factor status. | Potatoes                 | Age, smoking, alcohol, family history of myocardial infarction, BMI, vitamin supplement use, vitamin E use, physical activity, aspirin use, 2-year follow-up period, presence of hypertension, presence of hypercholesterolemia, energy intake                                                | 8   | 1.41 (NA)<br>5 vs. 1 quintile         |
| Kahn      | 1984 | US     | AHS     | >30   | Both | 27,530 | 247       | Dietary questionnaire | All-cause mortality | Death tapes                                                                                   | Potatoes                 | NA                                                                                                                                                                                                                                                                                            | 21  | 0.81 (0.67, 0.97)<br>4 vs. 1 quartile |
| Kato      | 1997 | US     | NYUWH S | 34-65 | W    | 14,727 | 100       | FFQ                   | CRC                 | Regional cancer registries                                                                    | Potatoes                 | Age, energy intake and place at enrolment and highest level of education                                                                                                                                                                                                                      | 7.1 | 1.05 (0.62, 1.79)<br>4 vs. 1 quartile |
| Larsson   | 2016 | Sweden | SMC     | 49-83 | W    | 32,805 | MI: 1,437 | FFQ, validated        | MI Stroke           | Linkage with the                                                                              | Total potato consumption | Age, education, family history of MI                                                                                                                                                                                                                                                          | 13  | MI: 0.97 (0.80, 1.17)                 |

Electronic Supplemental Material

|          |      |        |      |       |      |         |                                                                               |                              |                     |                                                                                            |                                                                              |                                                                                                                                                                                                                                    |      |                                                                                                                                           |
|----------|------|--------|------|-------|------|---------|-------------------------------------------------------------------------------|------------------------------|---------------------|--------------------------------------------------------------------------------------------|------------------------------------------------------------------------------|------------------------------------------------------------------------------------------------------------------------------------------------------------------------------------------------------------------------------------|------|-------------------------------------------------------------------------------------------------------------------------------------------|
|          |      |        |      |       |      |         | <i>Stroke:</i><br>2,022<br><br><i>HF:</i><br>1,177                            |                              | HF                  | Swedish National Patient Register and the Swedish Cause of Death Register                  | (Boiled potatoes, fried potatoes, and French fries)                          | before 60 y of age, smoking, aspirin use, walking or bicycling, exercise, BMI, history of hypertension, history of hypercholesterolemia, alcohol consumption, energy intake, mDASH diet score                                      |      | Stroke:<br>0.86 (0.73, 1.00)<br><br>HF:<br>1.01 (0.82, 1.25)<br><br>5 vs. 1 quintile                                                      |
| Larsson  | 2016 | Sweden | COSM | 45-79 | M    | 36,508  | <i>MI:</i><br>2,979<br><br><i>Stroke:</i><br>2,509<br><br><i>HF:</i><br>1,462 | FFQ, validated               | MI<br>Stroke<br>HF  | Linkage with the Swedish National Patient Register and the Swedish Cause of Death Register | Total potato consumption (Boiled potatoes, fried potatoes, and French fries) | Age, education, family history of MI before 60 y of age, smoking, aspirin use, walking or bicycling, exercise, BMI, history of hypertension, history of hypercholesterolemia, alcohol consumption, energy intake, mDASH diet score | 13   | <i>MI:</i><br>1.05 (0.92, 1.19)<br><br><i>Stroke:</i><br>1.00 (0.87, 1.15)<br><br><i>HF:</i><br>0.91 (0.75, 1.10)<br><br>5 vs. 1 quintile |
| Leenders | 2013 | Europe | EPIC | 25-70 | Both | 451,151 | 25,682                                                                        | Country-specific instruments | All-cause mortality | National Registry                                                                          | Potatoes                                                                     | Smoking, alcohol, BMI, physical activity, education, and processed meat consumption, fruit                                                                                                                                         | 12.8 | 1.00 (0.99, 1.01)<br><br>3 vs. 1 tertile                                                                                                  |
| Liu      | 2004 | USA    | WHS  | ≥45   | W    | 38,018  | 1,614                                                                         | FFQ                          | T2D                 | Self-reported/ADA criteria                                                                 | Potatoes and other tubers                                                    | Age, energy intake, BMI, smoking, alcohol, physical activity, hypertension, hypercholesterolemia, family history of diabetes                                                                                                       | 8.8  | 1.02 (0.86, 1.22)<br><br>5 vs. 1 quintile                                                                                                 |
| Michels  | 2000 | US     | NHS  | 30-55 | W    | 88,764  | 724                                                                           | FFQ, validated               | C, R                | Family reports, National death Index, US                                                   | Total potato consumption (mashed or baked, French                            | Age, family history of colorectal cancer, sigmoidoscopy, height, BMI, pack-                                                                                                                                                        | 6    | C:<br>1.12 (NA)<br><br>R:                                                                                                                 |

Electronic Supplemental Material

|          |      |         |        |       |      |        |       |                                  |        |                                                                                        |                                                                               |                                                                                                                                                                                                                         |                        |                                                                |
|----------|------|---------|--------|-------|------|--------|-------|----------------------------------|--------|----------------------------------------------------------------------------------------|-------------------------------------------------------------------------------|-------------------------------------------------------------------------------------------------------------------------------------------------------------------------------------------------------------------------|------------------------|----------------------------------------------------------------|
|          |      |         |        |       |      |        |       |                                  |        | Postal Service, medical and pathology reports                                          | fries, potato chips)                                                          | years of smoking, alcohol intake, physical activity, aspirin use, vitamin supplement intake, total caloric intake, and red meat consumption.                                                                            |                        | 1.03 (0.86, 1.22)<br>5 vs. 1 quintile                          |
| Michels  | 2000 | US      | HPFS   | 40-75 | M    | 47,325 | 457   | FFQ, validated                   | C, R   | Family reports, National death Index, US Postal Service, medical and pathology reports | Total potato consumption (mashed or baked, French fries, potato chips)        | Age, family history of colorectal cancer, sigmoidoscopy, height, BMI, pack-years of smoking, alcohol intake, physical activity, aspirin use, vitamin supplement intake, total caloric intake, and red meat consumption. | 6                      | C:<br>1.07 (NA)<br>R:<br>1.83 (0.86, 1.22)<br>5 vs. 1 quintile |
| Mizrahi  | 2009 | Finland | FMCHES | 40-74 | Both | 3,932  | 625   | 1-year dietary history interview | Stroke | Finnish Hospital Discharge Register; Statistics Finland                                | Potatoes                                                                      | Age, sex, BMI, smoking, physical activity, serum cholesterol level, blood pressure and energy intake                                                                                                                    | 24                     | 0.86 (0.68, 1.09)<br>4 vs. 1 quartile                          |
| Montonen | 2003 | Finland | FMCHES | 40-69 | Both | 4,316  | 156   | Dietary history interview        | T2D    | Registration to the Social Insurance Institution                                       | Potatoes                                                                      | Age, sex, area, energy intake, BMI, smoking, vegetables, fruit and berries                                                                                                                                              | 10                     | 1.42 (1.02, 1.98)<br>4 vs. 1 quartile                          |
| Mucci    | 2006 | Sweden  | SMC    | 49-83 | W    | 61,467 | 741   | FFQ, validated                   | CRC    | Swedish Cancer registry                                                                | Pan-fried potatoes                                                            | Age, BMI, education, alcohol, energy intake, saturated fat, fiber                                                                                                                                                       | 823,072 person-years   | 1.10 (0.90, 1.40)<br>3 vs. 1 tertile                           |
| Muraki   | 2015 | US      | NHS    | 30-55 | W    | 70,773 | 7,436 | FFQ, validated                   | T2D    | Self-reported (validated)                                                              | Total potato consumption (baked, boiled, or mashed potatoes and French fries) | Age, ethnicity smoking, alcohol intake, multivitamin use, physical activity, a family history of diabetes, menopausal status                                                                                            | 1,584,572 person-years | 1.27 (1.04, 1.56)<br>5 vs. 1 quintile                          |

Electronic Supplemental Material

|          |      |        |                     |               |      |        |             |                                              |                     |                                                                |                                                                               |                                                                                                                                                                                                                           |                        |                                                           |
|----------|------|--------|---------------------|---------------|------|--------|-------------|----------------------------------------------|---------------------|----------------------------------------------------------------|-------------------------------------------------------------------------------|---------------------------------------------------------------------------------------------------------------------------------------------------------------------------------------------------------------------------|------------------------|-----------------------------------------------------------|
|          |      |        |                     |               |      |        |             |                                              |                     |                                                                |                                                                               | and postmenopausal hormone use, total energy intake, aHEI score, BMI                                                                                                                                                      |                        |                                                           |
| Muraki   | 2015 | US     | NHS II              | 25-42         | W    | 87,739 | 4,621       | FFQ, validated                               | T2D                 | Self-reported (validated)                                      | Total potato consumption (baked, boiled, or mashed potatoes and French fries) | Age, ethnicity smoking, alcohol intake, multivitamin use, physical activity, a family history of diabetes, menopausal status and postmenopausal hormone use, oral contraceptive use, total energy intake, aHEI score, BMI | 1,610,311 person-years | 1.38 (1.08, 1.76)<br>5 vs. 1 quintile                     |
| Muraki   | 2015 | US     | HPFS                | 40-75         | M    | 40,669 | 3,305       | FFQ, validated                               | T2D                 | Self-reported (validated)                                      | Total potato consumption (baked, boiled, or mashed potatoes and French fries) | Age, ethnicity smoking, alcohol intake, multivitamin use, physical activity, a family history of diabetes, total energy intake, aHEI score, BMI                                                                           | 793,124 person-years   | 1.38 (1.07, 1.78)<br>5 vs. 1 quintile                     |
| Osella   | 2018 | Italy  | NUTRIH EP and MICOL | 18-95 and >30 | Both | 2,442  | 396         | FFQ, validated                               | All-cause mortality | Death certificates                                             | Total potato consumption                                                      | Age, project, sex, job, educational level, systolic and diastolic blood pressure at baseline, adherence to Mediterranean diet, BMI, presence of any disease, alcohol intake, total energy intake                          | 11                     | 0.75 (0.53, 1.07)<br>5 vs. 1 quintile                     |
| Sonested | 2015 | Sweden | MDCS                | 44-74         | Both | 26,445 | 1,344/1,176 | Modified diet history method, FFQ, validated | CHD<br>Stroke       | Linkage with Swedish Hospital Discharge Registry and Cause-of- | Potatoes                                                                      | Age, sex, season, diet method version, energy intake, BMI, smoking, alcohol consumption, leisure-time                                                                                                                     | 14                     | CHD:<br>1.01 (0.86, 1.17)<br>Stroke:<br>1.08 (0.90, 1.31) |

Electronic Supplemental Material

|              |      |        |             |       |      |        |       |                |                     |                                                                                                                                                                                    |                          |                                                                                                                                                                                                                                                                                    |     |                                               |
|--------------|------|--------|-------------|-------|------|--------|-------|----------------|---------------------|------------------------------------------------------------------------------------------------------------------------------------------------------------------------------------|--------------------------|------------------------------------------------------------------------------------------------------------------------------------------------------------------------------------------------------------------------------------------------------------------------------------|-----|-----------------------------------------------|
|              |      |        |             |       |      |        |       |                |                     | death Registry                                                                                                                                                                     |                          | physical activity, and education.                                                                                                                                                                                                                                                  |     | 5 vs. 1 quintile                              |
| Steinmetz    | 1994 | US     | IWHS        | 55-69 | W    | 41,837 | 212   | FFQ            | C                   | State Health Registry of Iowa                                                                                                                                                      | Potatoes                 | Age, energy intake                                                                                                                                                                                                                                                                 | 5   | 1.24 (0.76, 2.04)                             |
|              |      |        |             |       |      |        |       |                |                     |                                                                                                                                                                                    |                          |                                                                                                                                                                                                                                                                                    |     | 5 vs. 1 quartile                              |
| Trichopoulos | 2005 | Greece | EPIC-Greece | 20-86 | Both | 1,302  | 131   | FFQ, validated | All-cause mortality | Death certificates, which were available in all instances                                                                                                                          | Potatoes                 | Age, sex, previous treatment for hypertension and/or previous treatment for hypercholesterolemia, diabetes mellitus at enrolment, years of schooling, smoking status, waist-to-hip ratio, metabolic equivalent score, body mass index, energy intake                               | 3.8 | 0.97 (0.80, 1.18)<br><br>per 40 g/d increment |
| Veronese     | 2017 | US     | OICS        | 45-79 | Both | 4,440  | 236   | FFQ, validated | All-cause mortality | Confirmed and adjudicated by several methods (autopsy report, coroner's report, death certificate medical records, National Death Index, obituary, or Social Security Death Index) | Fried potatoes           | Age, sex, race/ethnicity, BMI, education, smoking habits, yearly income, Physical Activity Scale for Elderly score, Charlson comorbidity index, daily energy intake, alcohol consumption, adherence to a Mediterranean diet, and Centre for Epidemiologic Studies-Depression scale | 8   | 1.11 (0.65, 1.91)<br><br>5 vs. 1 quartile     |
| Villegas     | 2007 | China  | SWHS        | 40-70 | W    | 64,227 | 1,608 | FFQ, validated | T2D                 | Identified through outcome follow-                                                                                                                                                 | Potatoes; Sweet potatoes | Multivariable adjusted                                                                                                                                                                                                                                                             | 4.6 | Potatoes<br>0.72 (NA)<br><br>Sweet potatoes   |

Electronic Supplemental Material

|             |      |         |              |       |      |        |       |                |     |                                                                                               |                          |                                                                                                                                                                                                                                                                                                                                       |      |                                                                                                                  |
|-------------|------|---------|--------------|-------|------|--------|-------|----------------|-----|-----------------------------------------------------------------------------------------------|--------------------------|---------------------------------------------------------------------------------------------------------------------------------------------------------------------------------------------------------------------------------------------------------------------------------------------------------------------------------------|------|------------------------------------------------------------------------------------------------------------------|
|             |      |         |              |       |      |        |       |                |     | up surveys                                                                                    |                          |                                                                                                                                                                                                                                                                                                                                       |      | 0.72 (0.51)<br>5 vs. 1 quintile                                                                                  |
| von Ruesten | 2013 | Germany | EPIC-Potsdam | 35-65 | Both | 23,531 | 837   | FFQ, validated | T2D | Self-reported /inquiry to the physician                                                       | Potatoes; Fried potatoes | Age, sex, energy intake, Body Mass Index, waist: hip ratio, smoking, alcohol, physical activity, Hypertension, high blood lipid levels, education, vitamin supplementation                                                                                                                                                            | 8    | Potatoes: 1.10 (0.95, 1.27)<br>per 100 g/d increase<br>Fried potatoes: 1.21 (0.75, 1.97)<br>per 100 g/d increase |
| Würtz       | 2016 | Denmark | DDCHS        | 50-64 | Both | 55,171 | 2,350 | FFQ, validated | MI  | Danish National Patient Register, Danish Cause of Death Register, Central Population Register | Potatoes                 | Age, energy intake, alcohol abstinence, alcohol intake, BMI, waist circumference, smoking status, physical activity, duration of schooling, menopausal status and use of hormone replacement therapy, fruits, sweets, soft drinks, lean dairy products, fatty dairy products, potato chips, refined cereals, wholegrain cereals, nuts | 13.6 | 1.03 (0.91, 1.17)<br>Per 150 g/d                                                                                 |
| Ye          | 2006 | Taiwan  | 7TT          | ≥30   | Both | 22,115 | 107   | FFQ            | CRC | Reviewing medical records and death certificates                                              | Sweet Potatoes           | NA                                                                                                                                                                                                                                                                                                                                    | 10   | 1.85 (1.08, 3.17)<br>Highest vs. lowest category                                                                 |



Electronic Supplemental Material

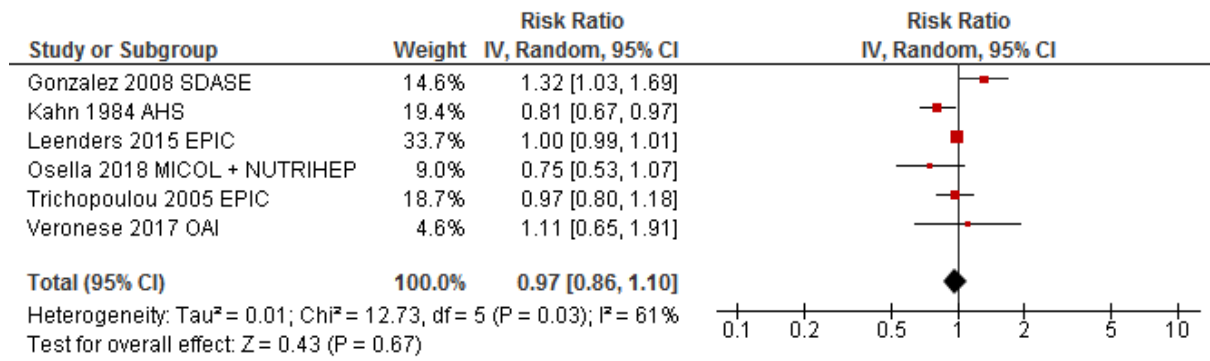

ESM Figure 2: Summary of relative risk of all-cause mortality for high versus low potatoes intake. 95% CI, 95% confidence interval.

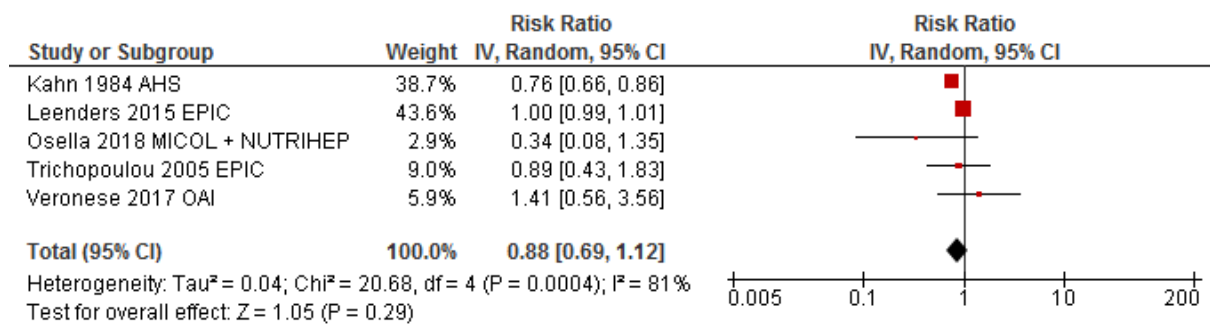

ESM Figure 3: Summary of relative risk of all-cause mortality for each 150 g/d increase in potatoes intake. 95% CI, 95% confidence interval.

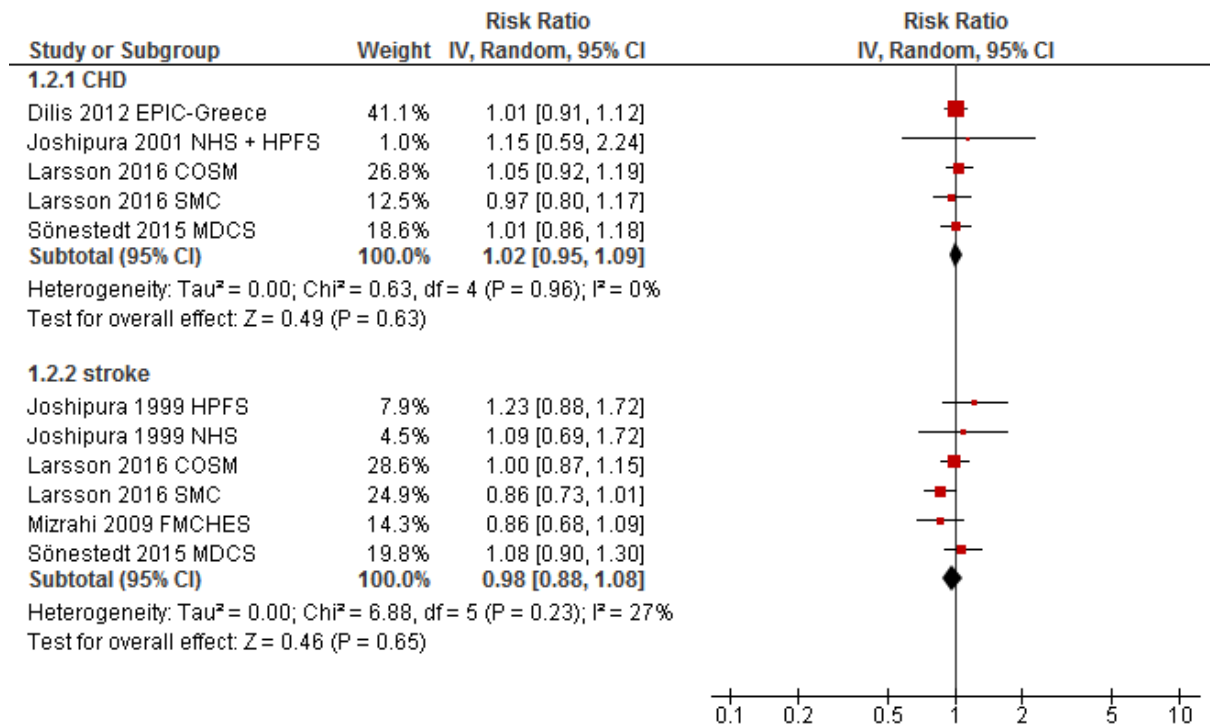

ESM Figure 4: Summary of relative risk of coronary heart disease and stroke for high versus low potatoes intake. 95% CI, 95% confidence interval.

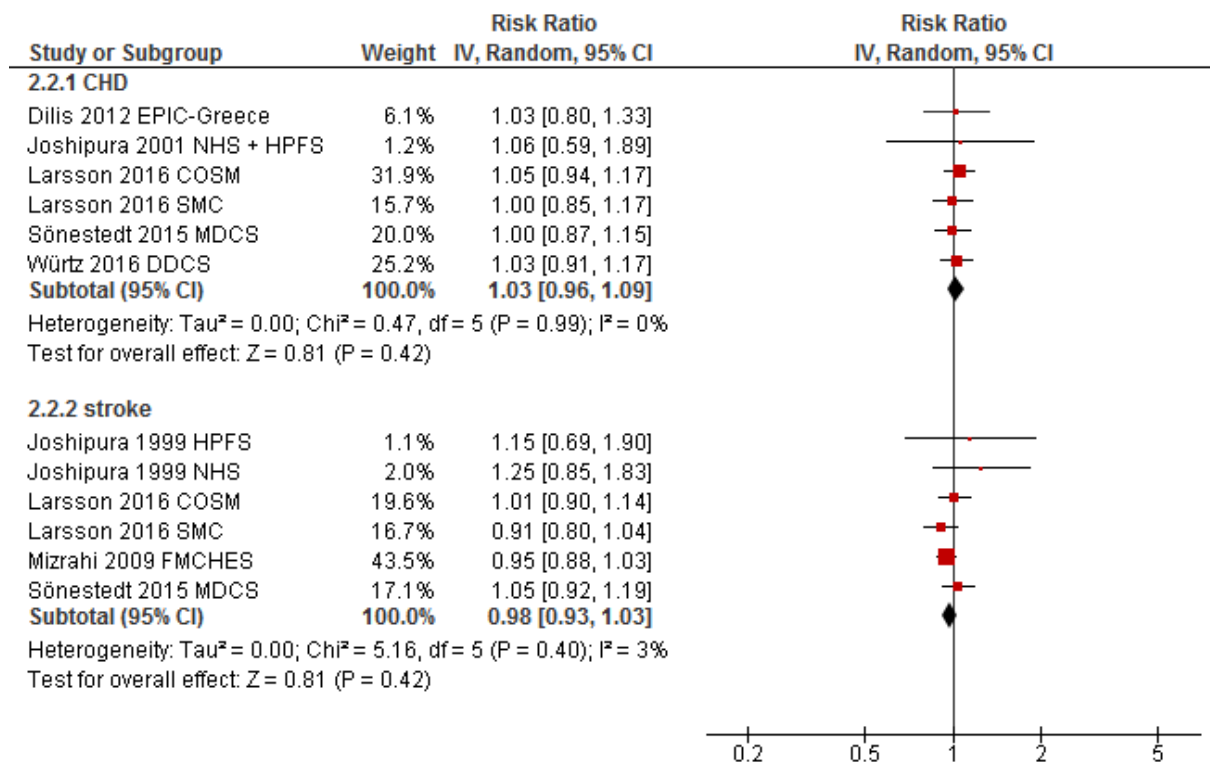

ESM Figure 5: Summary of relative risk of coronary heart disease and stroke for each 150 g/d increase in potatoes intake. 95% CI, 95% confidence interval.

Electronic Supplemental Material

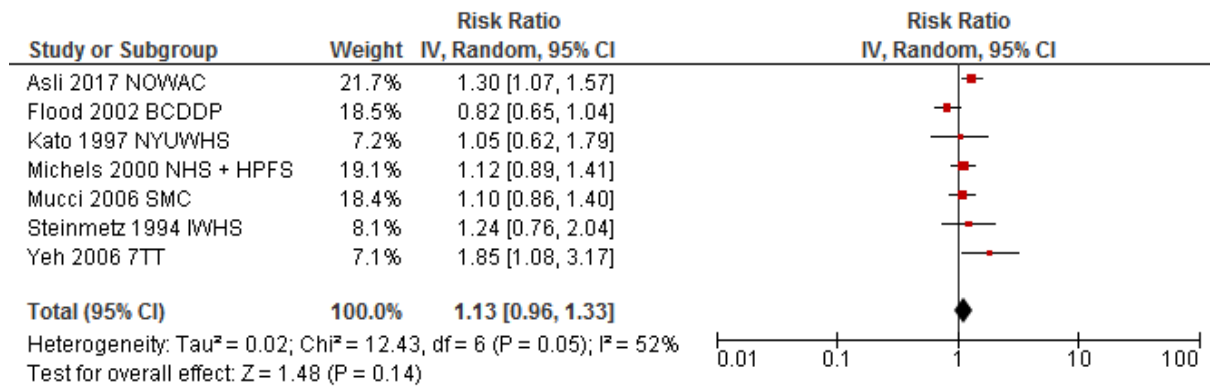

ESM Figure 6: Summary of relative risk of colorectal cancer for high versus low potatoes intake. 95% CI, 95% confidence interval.

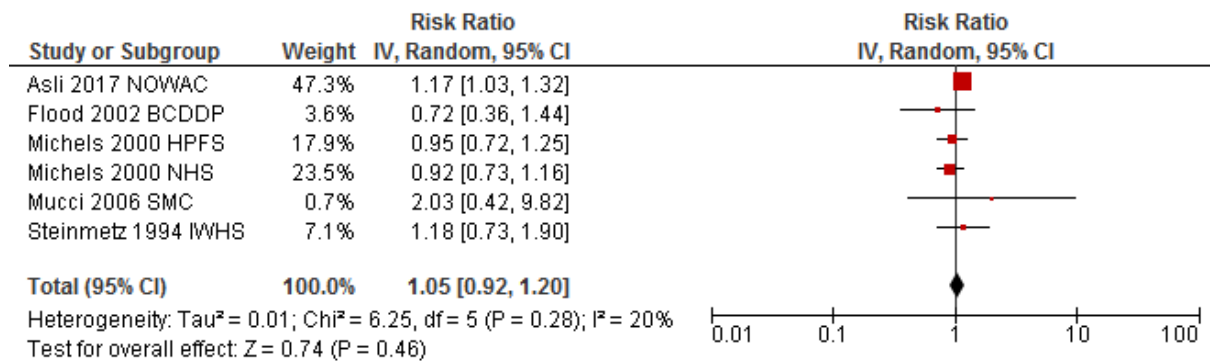

ESM Figure 7: Summary of relative risk of colorectal cancer for each 150 g/d increase in potatoes intake. 95% CI, 95% confidence interval.

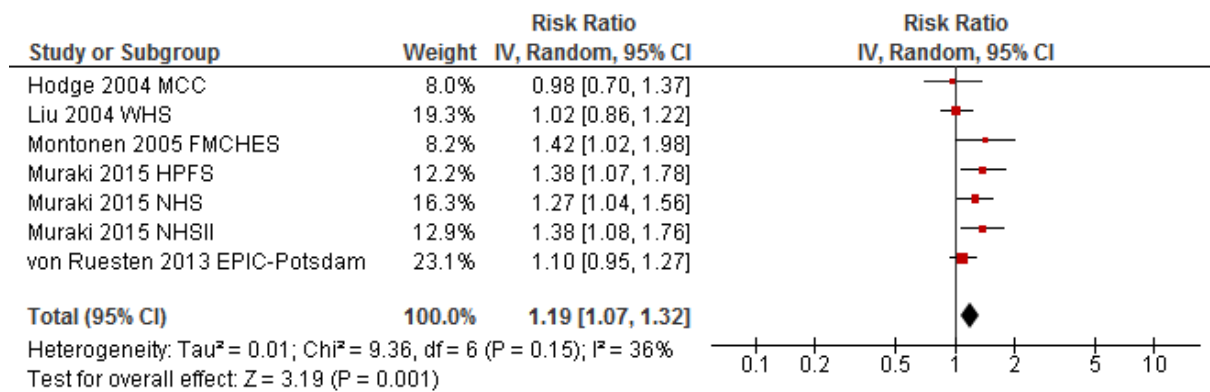

ESM Figure 8: Summary of relative risk of type 2 diabetes for high versus low potatoes intake. 95% CI, 95% confidence interval.

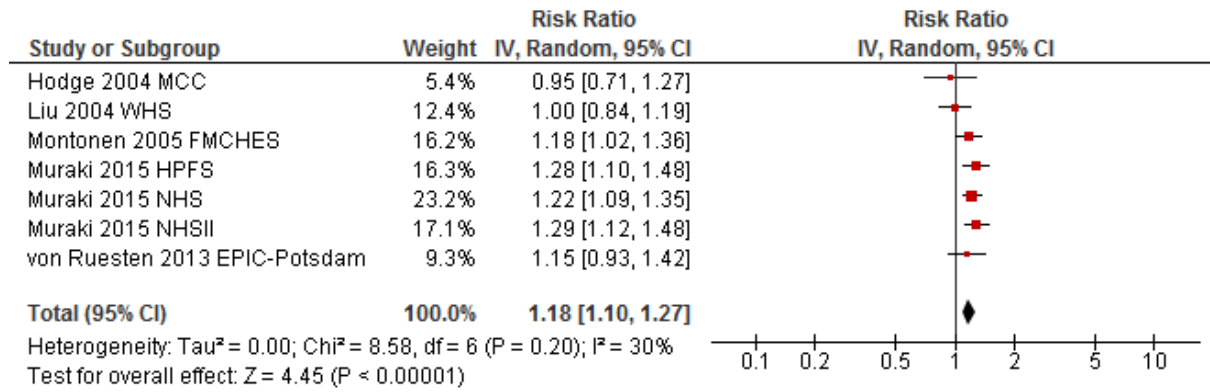

ESM Figure 9: Summary of relative risk of type 2 diabetes for each 150 g/d increase in potatoes intake. 95% CI, 95% confidence interval.

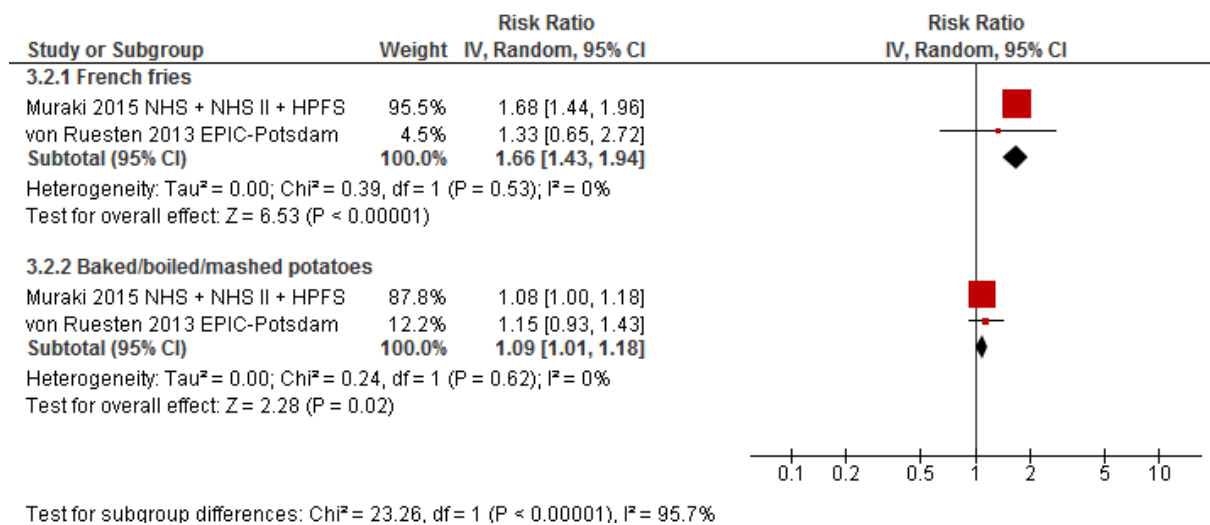

ESM Figure 10: Summary of relative risk of type 2 diabetes for each 150 g/d increase in French fries vs. Baked/boiled/mashed potatoes intake. 95% CI, 95% confidence interval.

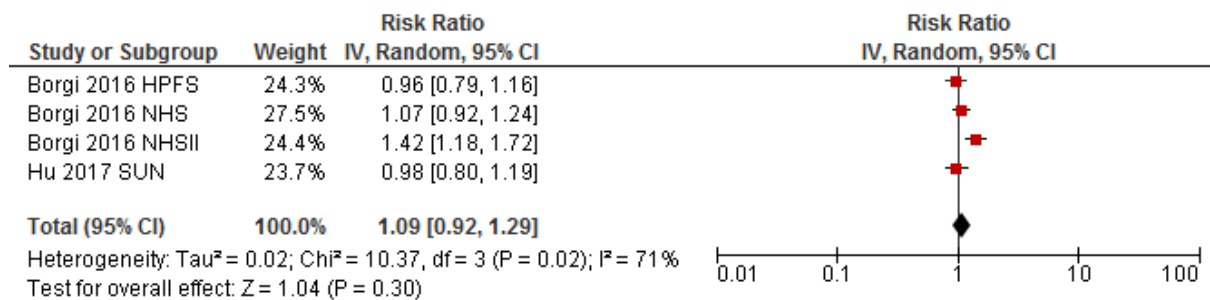

ESM Figure 11: Summary of relative risk of hypertension for high versus low potatoes intake. 95% CI, 95% confidence interval.

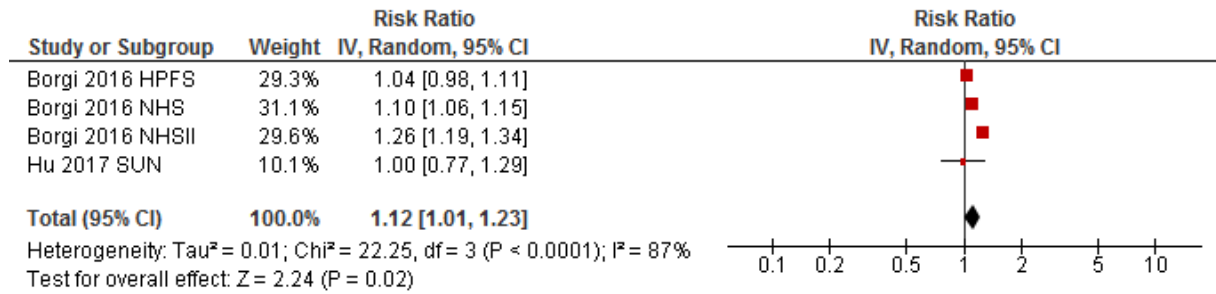

ESM Figure 12: Summary of relative risk of hypertension for each 150 g/d increase in potatoes intake. 95% CI, 95% confidence interval.

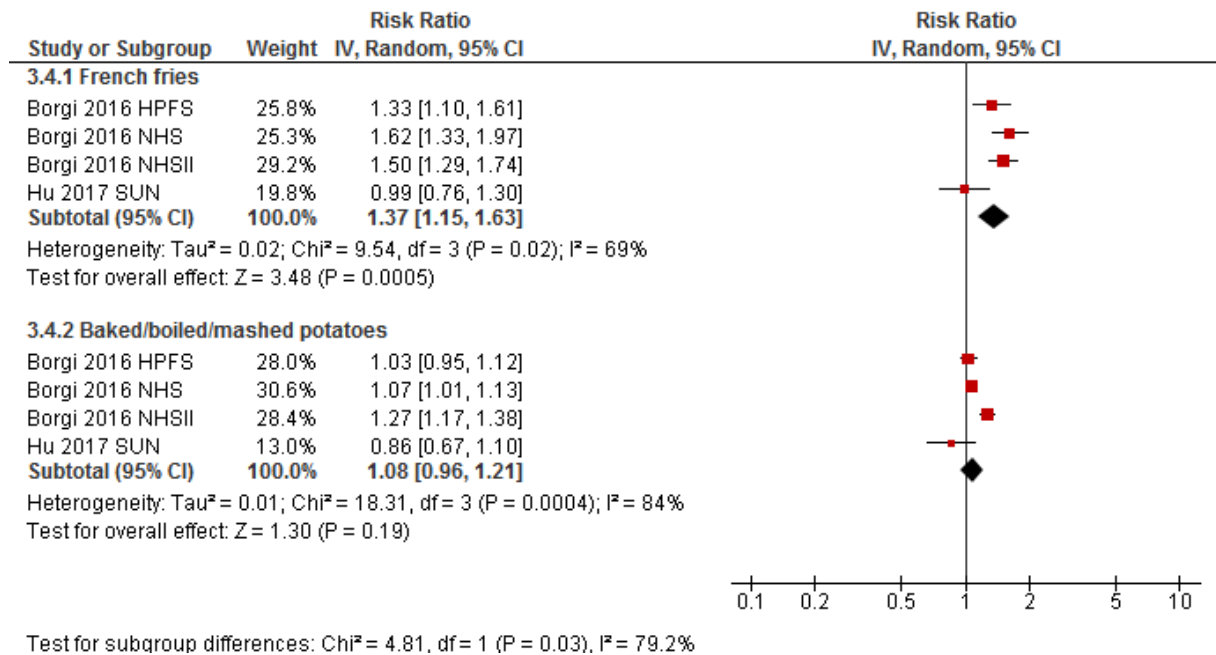

ESM Figure 13: Summary of relative risk of hypertension for each 150 g/d increase in French fries vs. Baked/boiled/mashed potatoes intake. 95% CI, 95% confidence interval.

Electronic Supplemental Material

ESM Table 2. Dose-response meta-analysis for each daily 150 gram increase in potatoes intake and risk of CHD, stratified by sex, follow-up, geographic location, and number of cases, and dietary assessment

| CHD                 | No of studies | RR   | 95% CI     | I <sup>2</sup> (%) | p-value for subgroup difference |
|---------------------|---------------|------|------------|--------------------|---------------------------------|
| Dose-response       | 7             | 1.03 | 0.96, 1.09 | 0                  |                                 |
| Sex                 |               |      |            |                    |                                 |
| Men and women       | 5             | 1.02 | 0.94, 1.11 | 0                  |                                 |
| Men                 | 1             | 1.05 | 0.94, 1.17 | NA                 | 0.84                            |
| Women               | 1             | 1.00 | 0.85, 1.17 | NA                 |                                 |
| Follow-up           |               |      |            |                    |                                 |
| ≥10 years           | 7             | 1.03 | 0.96, 1.09 | 0                  |                                 |
| Geographic location |               |      |            |                    |                                 |
| Europe              | 5             | 1.03 | 0.96, 1.09 | 0                  | 0.91                            |
| America             | 2             | 1.06 | 0.59, 1.89 | NA                 |                                 |
| Number of cases     |               |      |            |                    |                                 |
| ≥1000               | 4             | 1.03 | 0.96, 1.09 | 0                  | 0.94                            |
| <1000               | 3             | 1.03 | 0.82, 1.30 | 0                  |                                 |
| Dietary assessment  |               |      |            |                    |                                 |
| validated           | 7             | 1.03 | 0.96, 1.09 | 0                  |                                 |

Electronic Supplemental Material

ESM Table 3. Dose-response meta-analysis for each daily 150 gram increase in potatoes intake and risk of stroke, stratified by sex, follow-up, geographic location, and number of cases, and dietary assessment

| Stroke              | No of studies | RR   | 95% CI     | I <sup>2</sup> (%) | p-value for subgroup difference |
|---------------------|---------------|------|------------|--------------------|---------------------------------|
| Dose-response       | 6             | 0.98 | 0.93, 1.03 | 3                  |                                 |
| Sex                 |               |      |            |                    |                                 |
| Men and women       | 2             | 0.98 | 0.90, 1.08 | 39                 |                                 |
| Men                 | 2             | 1.02 | 0.91, 1.15 | 0                  | 0.95                            |
| Women               | 2             | 1.01 | 0.75, 1.36 | 58                 |                                 |
| Follow-up           |               |      |            |                    |                                 |
| ≥10 years           | 6             | 0.98 | 0.93, 1.03 | 3                  |                                 |
| Geographic location |               |      |            |                    |                                 |
| Europe              | 4             | 0.97 | 0.92, 1.03 | 3                  | 0.16                            |
| America             | 2             | 1.21 | 0.89, 1.64 | 0                  |                                 |
| Number of cases     |               |      |            |                    |                                 |
| ≥1000               | 3             | 0.99 | 0.91, 1.07 | 19                 | 0.94                            |
| <1000               | 3             | 1.00 | 0.86, 1.15 | 17                 |                                 |
| Dietary assessment  |               |      |            |                    |                                 |
| validated           | 5             | 1.00 | 0.93, 1.08 | 4                  | 0.32                            |
| not validated       | 1             | 0.95 | 0.88, 1.03 | NA                 |                                 |

Electronic Supplemental Material

ESM Table 4. Dose-response meta-analysis for each daily 150 gram increase in potatoes intake and risk of CRC, stratified by sex, follow-up, geographic location, and number of cases, and dietary assessment

| CRC                 | No of studies | RR   | 95% CI     | I <sup>2</sup> (%) | p-value for subgroup difference |
|---------------------|---------------|------|------------|--------------------|---------------------------------|
| Dose-response       | 6             | 1.05 | 0.92, 1.20 | 20                 |                                 |
| Sex                 |               |      |            |                    |                                 |
| Men                 | 1             | 0.95 | 0.72, 1.25 | NA                 | 0.47                            |
| Women               | 5             | 1.07 | 0.91, 1.25 | 24                 |                                 |
| Follow-up           |               |      |            |                    |                                 |
| <10 years           | 4             | 0.94 | 0.80, 1.11 | 0                  | 0.04                            |
| ≥10 years           | 2             | 1.17 | 1.04, 1.33 | 0                  |                                 |
| Geographic location |               |      |            |                    |                                 |
| Europe              | 2             | 1.17 | 1.04, 1.33 | 0                  | 0.04                            |
| America             | 4             | 0.94 | 0.80, 1.11 | 0                  |                                 |
| Number of cases     |               |      |            |                    |                                 |
| <1000               | 6             | 1.05 | 0.92, 1.20 | 20                 |                                 |
| Dietary assessment  |               |      |            |                    |                                 |
| validated           | 5             | 1.00 | 0.93, 1.08 | 4                  | 0.32                            |
| not validated       | 1             | 0.95 | 0.88, 1.03 | NA                 |                                 |



Electronic Supplemental Material

ESM Table 5. Dose-response meta-analysis for each daily 150 gram increase in potatoes intake and risk of type 2 diabetes, stratified by sex, follow-up, geographic location, and number of cases, and dietary assessment

| Type 2 diabetes     | No of studies | RR   | 95% CI     | I <sup>2</sup> (%) | p-value for subgroup difference |
|---------------------|---------------|------|------------|--------------------|---------------------------------|
| Dose-response       | 7             | 1.18 | 1.10, 1.27 | 30                 |                                 |
| Sex                 |               |      |            |                    |                                 |
| Men and women       | 3             | 1.13 | 1.01, 1.27 | 0                  |                                 |
| Men                 | 1             | 1.28 | 1.10, 1.48 | NA                 | 0.44                            |
| Women               | 3             | 1.17 | 1.03, 1.34 | 61                 |                                 |
| Follow-up           |               |      |            |                    |                                 |
| ≥10 years           | 4             | 1.23 | 1.16, 1.32 | 0                  | 0.01                            |
| <10 years           | 3             | 1.04 | 0.92, 1.17 | 0                  |                                 |
| Geographic location |               |      |            |                    |                                 |
| Europe              | 3             | 1.11 | 1.00, 1.23 | 6                  | 0.05                            |
| America             | 3             | 1.25 | 1.16, 1.35 | 0                  |                                 |
| Asia & Australia    | 1             | 0.95 | 0.71, 1.27 | NA                 |                                 |
| Number of cases     |               |      |            |                    |                                 |
| ≥1000               | 6             | 1.20 | 1.12, 1.28 | 18                 | 0.12                            |
| <1000               | 1             | 0.95 | 0.71, 1.27 | NA                 |                                 |
| Dietary assessment  |               |      |            |                    |                                 |
| validated           | 5             | 1.03 | 0.88, 1.21 | 35                 | 0.59                            |
| not validated       | 1             | 1.18 | 0.73, 1.90 | NA                 |                                 |

ESM Table 6: Linear dose-response meta-analysis investigating the association between potatoes intake and the risk of all-cause mortality, coronary heart disease, stroke, colorectal cancer, type 2 diabetes and hypertension, and NutriGrade grading.

| Outcome                | Type of potato consumption  | No of studies | RR   | 95% CI     | I <sup>2</sup> (%) | NutriGrade grading |
|------------------------|-----------------------------|---------------|------|------------|--------------------|--------------------|
| All-cause mortality    | Total potato consumption    | 5             | 0.88 | 0.69, 1.12 | 81                 | Low                |
| Coronary heart disease | Total potato consumption    | 7             | 1.03 | 0.96, 1.09 | 0                  | Low                |
| Stroke                 | Total potato consumption    | 6             | 0.98 | 0.93, 1.03 | 3                  | Low                |
| Colorectal cancer      | Total potato consumption    | 6             | 1.05 | 0.92, 1.20 | 20                 | Low                |
| Type 2 diabetes        | Total potato consumption    | 7             | 1.18 | 1.10, 1.27 | 30                 | Low                |
|                        | French Fries                | 4             | 1.66 | 1.43, 1.94 | 0                  | Moderate           |
|                        | Baked/<br>boiled/<br>mashed | 4             | 1.09 | 1.01, 1.18 | 0                  | Low                |
| Hypertension           | Total potato consumption    | 4             | 1.12 | 1.01, 1.23 | 87                 | Low                |
|                        | French Fries                | 4             | 1.37 | 1.15, 1.63 | 69                 | Moderate           |
|                        | Baked/<br>boiled/<br>mashed | 4             | 1.08 | 0.96, 1.21 | 84                 | Low                |

**ESM References**

1. Bazzano LA, Li TY, Joshipura KJ, Hu FB. Intake of fruit, vegetables, and fruit juices and risk of diabetes in women. *Diabetes Care* 2008;31(7):1311-7. doi: 10.2337/dc08-0080.
2. Belin RJ, Greenland P, Allison M, Martin L, Shikany JM, Larson J, Tinker L, Howard BV, Lloyd-Jones D, Van Horn L. Diet quality and the risk of cardiovascular disease: the Women's Health Initiative (WHI). *Am J Clin Nutr* 2011;94(1):49-57. doi: 10.3945/ajcn.110.011221.
3. Bendinelli B, Masala G, Saieva C, Salvini S, Calonico C, Sacerdote C, Agnoli C, Grioni S, Frasca G, Mattiello A, et al. Fruit, vegetables, and olive oil and risk of coronary heart disease in Italian women: the EPICOR Study. *Am J Clin Nutr* 2011;93(2):275-83. doi: 10.3945/ajcn.110.000521.
4. Bhupathiraju SN, Wedick NM, Pan A, Manson JE, Rexrode KM, Willett WC, Rimm EB, Hu FB. Quantity and variety in fruit and vegetable intake and risk of coronary heart disease. *Am J Clin Nutr* 2013;98(6):1514-23. doi: 10.3945/ajcn.113.066381.
5. Buckland G, Gonzalez CA, Agudo A, Vilardeell M, Berenguer A, Amiano P, Ardanaz E, Arriola L, Barricarte A, Basterretxea M, et al. Adherence to the Mediterranean diet and risk of coronary heart disease in the Spanish EPIC Cohort Study. *Am J Epidemiol* 2009;170(12):1518-29. doi: 10.1093/aje/kwp282.
6. Cooper AJ, Forouhi NG, Ye Z, Buijsse B, Arriola L, Balkau B, Barricarte A, Beulens JW, Boeing H, Buchner FL, et al. Fruit and vegetable intake and type 2 diabetes: EPIC-InterAct prospective study and meta-analysis. *Eur J Clin Nutr* 2012;66(10):1082-92. doi: 10.1038/ejcn.2012.85.
7. Dauchet L, Amouyel P, Hercberg S, Dallongeville J. Fruit and vegetable consumption and risk of coronary heart disease: a meta-analysis of cohort studies. *J Nutr* 2006;136(10):2588-93.
8. Del Gobbo LC, Kalantarian S, Imamura F, Lemaitre R, Siscovick DS, Psaty BM, Mozaffarian D. Contribution of Major Lifestyle Risk Factors for Incident Heart Failure in Older Adults: The Cardiovascular Health Study. *JACC Heart failure* 2015;3(7):520-8. doi: 10.1016/j.jchf.2015.02.009.
9. Ford ES, Bergmann MM, Kroger J, Schienkiewitz A, Weikert C, Boeing H. Healthy living is the best revenge: findings from the European Prospective Investigation Into Cancer and Nutrition-Potsdam study. *Arch Intern Med* 2009;169(15):1355-62. doi: 10.1001/archinternmed.2009.237.
10. Fraser GE, Shavlik DJ. Risk factors for all-cause and coronary heart disease mortality in the oldest-old. The Adventist Health Study. *Arch Intern Med* 1997;157. doi: 10.1001/archinte.1997.00440400099012.

11. Fraser GE, Sumbureru D, Pribis P, Neil RL, Frankson MA. Association among health habits, risk factors, and all-cause mortality in a black California population. *Epidemiology (Cambridge, Mass)* 1997;8(2):168-74.
12. Genkinger JM, Platz EA, Hoffman SC, Comstock GW, Helzlsouer KJ. Fruit, vegetable, and antioxidant intake and all-cause, cancer, and cardiovascular disease mortality in a community-dwelling population in Washington County, Maryland. *Am J Epidemiol* 2004;160(12):1223-33. doi: 10.1093/aje/.
13. Gillman MW, Cupples LA, Gagnon D, Posner BM, Ellison RC, Castelli WP, Wolf PA. Protective effect of fruits and vegetables on development of stroke in men. *Jama* 1995;273(14):1113-7.
14. Hansen CP, Overvad K, Kyro C, Olsen A, Tjønneland A, Johnsen SP, Jakobsen MU, Dahm CC. Adherence to a Healthy Nordic Diet and Risk of Stroke: A Danish Cohort Study. *Stroke* 2017;48(2):259-64. doi: 10.1161/strokeaha.116.015019.
15. Hansen L, Dragsted LO, Olsen A, Christensen J, Tjønneland A, Schmidt EB, Overvad K. Fruit and vegetable intake and risk of acute coronary syndrome. *Br J Nutr* 2010;104(2):248-55. doi: 10.1017/s0007114510000462.
16. Hirvonen T, Pietinen P, Virtanen M, Ovaskainen ML, Hakkinen S, Albanes D, Virtamo J. Intake of flavonols and flavones and risk of coronary heart disease in male smokers. *Epidemiology (Cambridge, Mass)* 2001;12(1):62-7.
17. Johnsen SP, Overvad K, Stripp C, Tjønneland A, Husted SE, Sorensen HT. Intake of fruit and vegetables and the risk of ischemic stroke in a cohort of Danish men and women. *Am J Clin Nutr* 2003;78(1):57-64.
18. Keli SO, Hertog MG, Feskens EJ, Kromhout D. Dietary flavonoids, antioxidant vitamins, and incidence of stroke: the Zutphen study. *Arch Intern Med* 1996;156(6):637-42.
19. Knuops KT, de Groot LC, Kromhout D, Perrin AE, Moreiras-Varela O, Menotti A, van Staveren WA. Mediterranean diet, lifestyle factors, and 10-year mortality in elderly European men and women: the HALE project. *Jama* 2004;292(12):1433-9. doi: 10.1001/jama.292.12.1433.
20. Kobylecki CJ, Afzal S, Davey Smith G, Nordestgaard BG. Genetically high plasma vitamin C, intake of fruit and vegetables, and risk of ischemic heart disease and all-cause mortality: a Mendelian randomization study. *Am J Clin Nutr* 2015;101(6):1135-43. doi: 10.3945/ajcn.114.104497.
21. Kurotani K, Nanri A, Goto A, Mizoue T, Noda M, Kato M, Inoue M, Tsugane S. Vegetable and fruit intake and risk of type 2 diabetes: Japan Public Health Center-based Prospective Study. *Br J Nutr* 2013;109(4):709-17. doi: 10.1017/s0007114512001705.

22. Lin J, Zhang SM, Cook NR, Rexrode KM, Liu S, Manson JE, Lee IM, Buring JE. Dietary intakes of fruit, vegetables, and fiber, and risk of colorectal cancer in a prospective cohort of women (United States). *Cancer causes & control : CCC* 2005;16(3):225-33. doi: 10.1007/s10552-004-4025-1.
23. Liu S, Lee IM, Ajani U, Cole SR, Buring JE, Manson JE. Intake of vegetables rich in carotenoids and risk of coronary heart disease in men: The Physicians' Health Study. *Int J Epidemiol* 2001;30(1):130-5.
24. Liu S, Manson JE, Lee IM, Cole SR, Hennekens CH, Willett WC, Buring JE. Fruit and vegetable intake and risk of cardiovascular disease: the Women's Health Study. *Am J Clin Nutr* 2000;72(4):922-8.
25. Mamluk L, O'Doherty MG, Orfanos P, Saitakis G, Woodside JV, Liao LM, Sinha R, Boffetta P, Trichopoulou A, Kee F. Fruit and vegetable intake and risk of incident of type 2 diabetes: results from the consortium on health and ageing network of cohorts in Europe and the United States (CHANCES). *Eur J Clin Nutr* 2016. doi: 10.1038/ejcn.2016.143.
26. Mann JI, Appleby PN, Key TJ, Thorogood M. Dietary determinants of ischaemic heart disease in health conscious individuals. *Heart* 1997;78(5):450-5.
27. Meyer KA, Kushi LH, Jacobs DR, Jr., Folsom AR. Dietary fat and incidence of type 2 diabetes in older Iowa women. *Diabetes Care* 2001;24(9):1528-35.
28. Misirli G, Benetou V, Lagiou P, Bamia C, Trichopoulos D, Trichopoulou A. Relation of the traditional Mediterranean diet to cerebrovascular disease in a Mediterranean population. *Am J Epidemiol* 2012;176(12):1185-92. doi: 10.1093/aje/kws205.
29. Mursu J, Virtanen JK, Tuomainen TP, Nurmi T, Voutilainen S. Intake of fruit, berries, and vegetables and risk of type 2 diabetes in Finnish men: the Kuopio Ischaemic Heart Disease Risk Factor Study. *Am J Clin Nutr* 2014;99(2):328-33. doi: 10.3945/ajcn.113.069641.
30. Nagura J, Iso H, Watanabe Y, Maruyama K, Date C, Toyoshima H, Yamamoto A, Kikuchi S, Koizumi A, Kondo T, et al. Fruit, vegetable and bean intake and mortality from cardiovascular disease among Japanese men and women: the JACC Study. *Br J Nutr* 2009;102(2):285-92. doi: 10.1017/s0007114508143586.
31. Neelakantan N, Naidoo N, Koh WP, Yuan JM, van Dam RM. The Alternative Healthy Eating Index Is Associated with a Lower Risk of Fatal and Nonfatal Acute Myocardial Infarction in a Chinese Adult Population. *J Nutr* 2016;146(7):1379-86. doi: 10.3945/jn.116.231605.
32. Nguyen B, Bauman A, Gale J, Banks E, Kritharides L, Ding D. Fruit and vegetable consumption and all-cause mortality: evidence from a large Australian cohort study. *The international journal of behavioral nutrition and physical activity* 2016;13:9. doi: 10.1186/s12966-016-0334-5.

33. Oude Griep LM, Geleijnse JM, Kromhout D, Ocke MC, Verschuren WM. Raw and processed fruit and vegetable consumption and 10-year coronary heart disease incidence in a population-based cohort study in the Netherlands. *PLoS One* 2010;5(10):e13609. doi: 10.1371/journal.pone.0013609.
34. Rautiainen S, Wang L, Lee IM, Manson JE, Buring JE, Sesso HD. Higher Intake of Fruit, but Not Vegetables or Fiber, at Baseline Is Associated with Lower Risk of Becoming Overweight or Obese in Middle-Aged and Older Women of Normal BMI at Baseline. *J Nutr* 2015;145(5):960-8. doi: 10.3945/jn.114.199158.
35. Shi Z, Zhang T, Byles J, Martin S, Avery JC, Taylor AW. Food Habits, Lifestyle Factors and Mortality among Oldest Old Chinese: The Chinese Longitudinal Healthy Longevity Survey (CLHLS). *Nutrients* 2015;7(9):7562-79. doi: 10.3390/nu7095353.
36. Stefler D, Malyutina S, Kubinova R, Pajak A, Peasey A, Pikhart H, Brunner EJ, Bobak M. Mediterranean diet score and total and cardiovascular mortality in Eastern Europe: the HAPIEE study. *Eur J Nutr* 2015. doi: 10.1007/s00394-015-1092-x.
37. Strandhagen E, Hansson PO, Bosaeus I, Isaksson B, Eriksson H. High fruit intake may reduce mortality among middle-aged and elderly men. *The Study of Men Born in 1913. Eur J Clin Nutr* 2000;54(4):337-41.
38. Tognon G, Nilsson LM, Lissner L, Johansson I, Hallmans G, Lindahl B, Winkvist A. The Mediterranean diet score and mortality are inversely associated in adults living in the subarctic region. *J Nutr* 2012;142(8):1547-53. doi: 10.3945/jn.112.160499.
39. Tognon G, Rothenberg E, Eiben G, Sundh V, Winkvist A, Lissner L. Does the Mediterranean diet predict longevity in the elderly? A Swedish perspective. *Age (Dordrecht, Netherlands)* 2011;33(3):439-50. doi: 10.1007/s11357-010-9193-1.
40. Tsubota-Utsugi M, Ohkubo T, Kikuya M, Metoki H, Kurimoto A, Suzuki K, Fukushima N, Hara A, Asayama K, Satoh H, et al. High fruit intake is associated with a lower risk of future hypertension determined by home blood pressure measurement: the OHASAMA study. *Journal of human hypertension* 2011;25(3):164-71. doi: 10.1038/jhh.2010.48.
41. Tucker KL, Hallfrisch J, Qiao N, Muller D, Andres R, Fleg JL. The combination of high fruit and vegetable and low saturated fat intakes is more protective against mortality in aging men than is either alone: the Baltimore Longitudinal Study of Aging. *J Nutr* 2005;135(3):556-61.
42. van den Brandt PA. The impact of a Mediterranean diet and healthy lifestyle on premature mortality in men and women. *Am J Clin Nutr* 2011;94(3):913-20. doi: 10.3945/ajcn.110.008250.
43. Villegas R, Shu XO, Gao YT, Yang G, Elasy T, Li H, Zheng W. Vegetable but not fruit consumption reduces the risk of type 2 diabetes in Chinese women. *J Nutr* 2008;138(3):574-80.

44. Wang JB, Fan JH, Dawsey SM, Sinha R, Freedman ND, Taylor PR, Qiao YL, Abnet CC. Dietary components and risk of total, cancer and cardiovascular disease mortality in the Linxian Nutrition Intervention Trials cohort in China. *Sci Rep* 2016;6:22619. doi: 10.1038/srep22619.
45. Wang L, Manson JE, Gaziano JM, Buring JE, Sesso HD. Fruit and vegetable intake and the risk of hypertension in middle-aged and older women. *Am J Hypertens* 2012;25(2):180-9. doi: 10.1038/ajh.2011.186.
46. Weng LC, Steffen LM, Szklo M, Nettleton J, Chambless L, Folsom AR. A diet pattern with more dairy and nuts, but less meat is related to lower risk of developing hypertension in middle-aged adults: the Atherosclerosis Risk in Communities (ARIC) study. *Nutrients* 2013;5(5):1719-33. doi: 10.3390/nu5051719.
47. Yu D, Zhang X, Gao YT, Li H, Yang G, Huang J, Zheng W, Xiang YB, Shu XO. Fruit and vegetable intake and risk of CHD: results from prospective cohort studies of Chinese adults in Shanghai. *Br J Nutr* 2014;111(2):353-62. doi: 10.1017/s0007114513002328.
48. Butler LM, Wang R, Koh WP, Yu MC. Prospective study of dietary patterns and colorectal cancer among Singapore Chinese. *Br J Cancer* 2008;99(9):1511-6. doi: 10.1038/sj.bjc.6604678.
49. Fung TT, Hu FB, Wu K, Chiuve SE, Fuchs CS, Giovannucci E. The Mediterranean and Dietary Approaches to Stop Hypertension (DASH) diets and colorectal cancer. *Am J Clin Nutr* 2010;92(6):1429-35. doi: 10.3945/ajcn.2010.29242.
50. George SM, Park Y, Leitzmann MF, Freedman ND, Dowling EC, Reedy J, Schatzkin A, Hollenbeck A, Subar AF. Fruit and vegetable intake and risk of cancer: a prospective cohort study. *Am J Clin Nutr* 2009;89(1):347-53. doi: 10.3945/ajcn.2008.26722.
51. Kunzmann AT, Coleman HG, Huang WY, Cantwell MM, Kitahara CM, Berndt SI. Fruit and vegetable intakes and risk of colorectal cancer and incident and recurrent adenomas in the PLCO cancer screening trial. *Int J Cancer* 2016;138(8):1851-61. doi: 10.1002/ijc.29922.
52. McCarl M, Harnack L, Limburg PJ, Anderson KE, Folsom AR. Incidence of colorectal cancer in relation to glycemic index and load in a cohort of women. *Cancer epidemiology, biomarkers & prevention : a publication of the American Association for Cancer Research, cosponsored by the American Society of Preventive Oncology* 2006;15(5):892-6. doi: 10.1158/1055-9965.epi-05-0700.
53. McCullough ML, Robertson AS, Chao A, Jacobs EJ, Stampfer MJ, Jacobs DR, Diver WR, Calle EE, Thun MJ. A prospective study of whole grains, fruits, vegetables and colon cancer risk. *Cancer causes & control : CCC* 2003;14(10):959-70.

54. Nomura AM, Wilkens LR, Murphy SP, Hankin JH, Henderson BE, Pike MC, Kolonel LN. Association of vegetable, fruit, and grain intakes with colorectal cancer: the Multiethnic Cohort Study. *Am J Clin Nutr* 2008;88(3):730-7.
55. Park Y, Subar AF, Kipnis V, Thompson FE, Mouw T, Hollenbeck A, Leitzmann MF, Schatzkin A. Fruit and vegetable intakes and risk of colorectal cancer in the NIH-AARP diet and health study. *Am J Epidemiol* 2007;166(2):170-80. doi: 10.1093/aje/kwm067.
56. Sanjoaquin MA, Appleby PN, Thorogood M, Mann JI, Key TJ. Nutrition, lifestyle and colorectal cancer incidence: a prospective investigation of 10998 vegetarians and non-vegetarians in the United Kingdom. *Br J Cancer* 2004;90(1):118-21. doi: 10.1038/sj.bjc.6601441.
57. Pietinen P, Malila N, Virtanen M, Hartman TJ, Tangrea JA, Albanes D, Virtamo J. Diet and risk of colorectal cancer in a cohort of Finnish men. *Cancer causes & control : CCC* 1999;10(5):387-96.
58. Sato Y, Tsubono Y, Nakaya N, Ogawa K, Kurashima K, Kuriyama S, Hozawa A, Nishino Y, Shibuya D, Tsuji I. Fruit and vegetable consumption and risk of colorectal cancer in Japan: The Miyagi Cohort Study. *Public Health Nutr* 2005;8(3):309-14.
59. Shibata A, Paganini-Hill A, Ross RK, Henderson BE. Intake of vegetables, fruits, beta-carotene, vitamin C and vitamin supplements and cancer incidence among the elderly: a prospective study. *Br J Cancer* 1992;66(4):673-9.
60. Singh PN, Fraser GE. Dietary risk factors for colon cancer in a low-risk population. *Am J Epidemiol* 1998;148(8):761-74.
61. Terry P, Giovannucci E, Michels KB, Bergkvist L, Hansen H, Holmberg L, Wolk A. Fruit, vegetables, dietary fiber, and risk of colorectal cancer. *J Natl Cancer Inst* 2001;93(7):525-33.
62. Tsubono Y, Otani T, Kobayashi M, Yamamoto S, Sobue T, Tsugane S. No association between fruit or vegetable consumption and the risk of colorectal cancer in Japan. *Br J Cancer* 2005;92(9):1782-4. doi: 10.1038/sj.bjc.6602566.
63. Vogtmann E, Xiang YB, Li HL, Levitan EB, Yang G, Waterbor JW, Gao J, Cai H, Xie L, Wu QJ, et al. Fruit and vegetable intake and the risk of colorectal cancer: results from the Shanghai Men's Health Study. *Cancer causes & control : CCC* 2013;24(11):1935-45. doi: 10.1007/s10552-013-0268-z.
64. Voorrips LE, Goldbohm RA, van Poppel G, Sturmans F, Hermus RJ, van den Brandt PA. Vegetable and fruit consumption and risks of colon and rectal cancer in a prospective cohort study: The Netherlands Cohort Study on Diet and Cancer. *Am J Epidemiol* 2000;152(11):1081-92.



65. Vulcan A, Brandstedt J, Manjer J, Jirstrom K, Ohlsson B, Ericson U. Fibre intake and incident colorectal cancer depending on fibre source, sex, tumour location and Tumour, Node, Metastasis stage. *Br J Nutr* 2015;114(6):959-69. doi: 10.1017/s0007114515002743.
66. Borch D, Juul-Hindsgaul N, Veller M, Astrup A, Jaskolowski J, Raben A. Potatoes and risk of obesity, type 2 diabetes, and cardiovascular disease in apparently healthy adults: a systematic review of clinical intervention and observational studies. *Am J Clin Nutr* 2016;104(2):489-98. doi: 10.3945/ajcn.116.132332.
67. McGill CR, Kurilich AC, Davignon J. The role of potatoes and potato components in cardiometabolic health: a review. *Ann Med* 2013;45(7):467-73. doi: 10.3109/07853890.2013.813633.
